# Supplementary material
Source: Springer Nature journal article supplement (https://www.springermedizin.de/resource/supplementary/12913_2013_3033_MOESM5_ESM.pdf/9533354)

**Percentage  
of  
respondent  
hospitals**

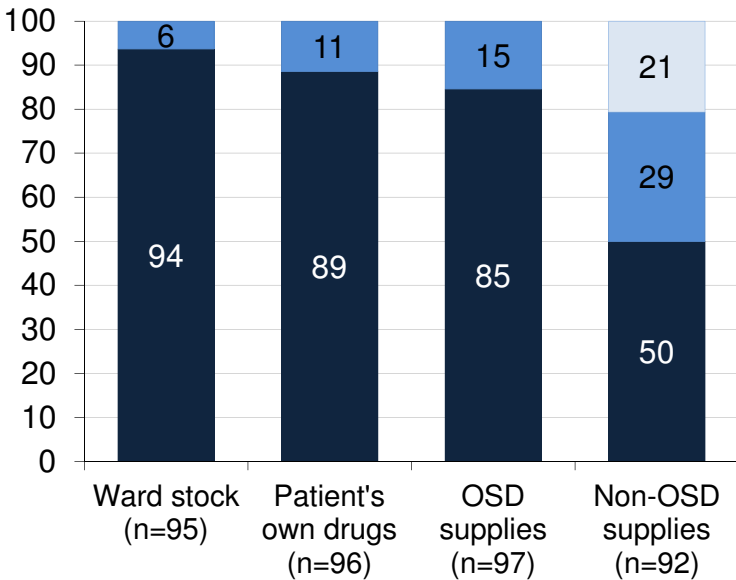

■ Majority of wards ■ Some wards ■ No ward

Supplement: MOESM5 [file 9533354]
